# Supplementary figures and images for: Mitotic spindle orientation distinguishes stem cell and terminal modes of neuron production in the early spinal cord
Source: Oxford University Press journal article supplement (doi:10.1242/dev.002519), 2007-04-30

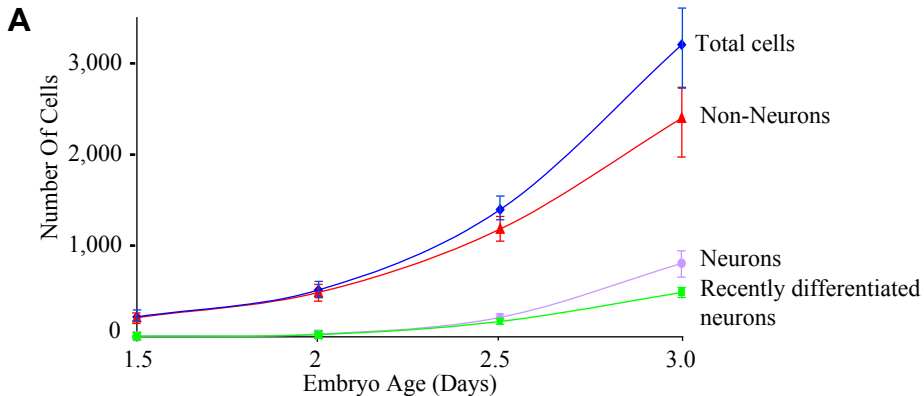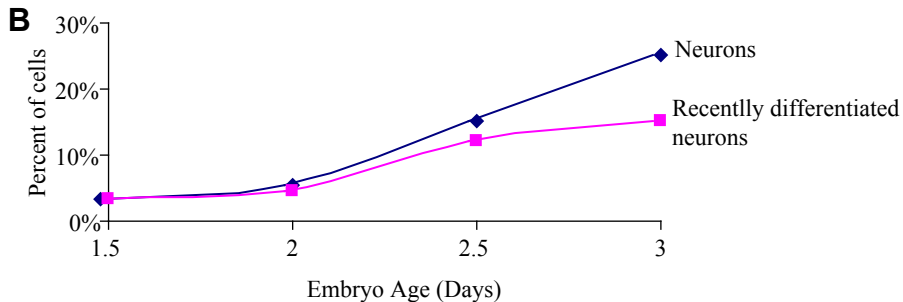

Supplement: dev002519figs1.pdf [file dev002519figs1.pdf]

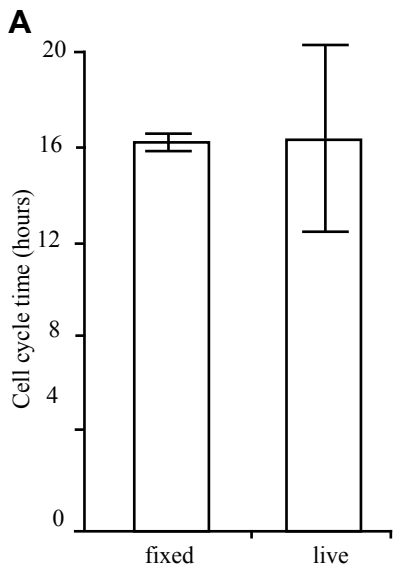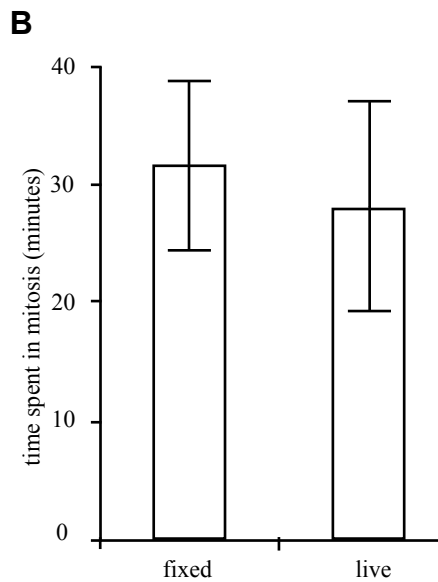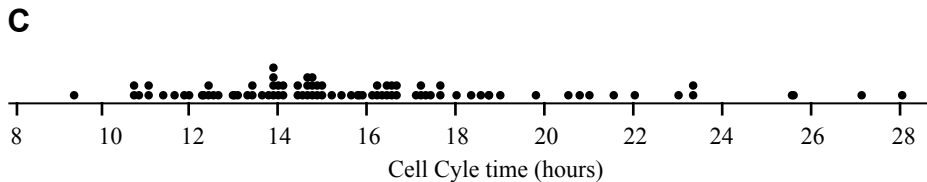

Supplement: dev002519figs2.pdf [file dev002519figs2.pdf]

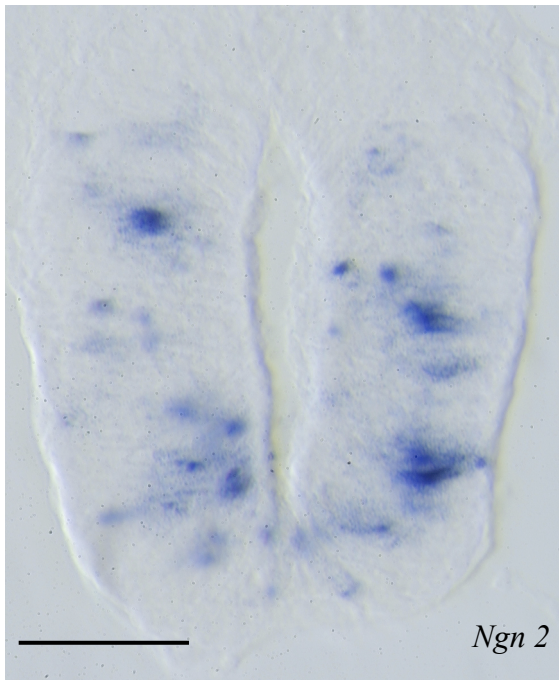

*Ngn 2*

Supplement: dev002519figs3.pdf [file dev002519figs3.pdf]
